# Supplementary material for: Expression of GEX1 Orthologs of Brassica rapa and Oryza sativa Rescued the Nuclear Fusion Defect of the Arabidopsis GEX1 Mutant
Source: MDPI journal article supplement (doi:10.3390/plants11141808), 2022-07-08
Supplement: s1 [file s1]

CRD

```

AtGEX1 MDRFSRKCLLFLLLIILLDSPL--TCHSWGWFSSSSSSAEDPYSSS----FSRSRKSNDPFSMEVFSDQKAVQVLE---NKLVLGLTSCWQNAYSYLLAGCKETIATEEKR 101
BrGEX1 MDHFKRRLYLLFL-LITLIDSPI--TCHSWGWFSSSGENTN----PS----SSRSIKSNTEFSIEVFSDDKAVQVLEDAKNKLAGPNSCWQNAYGYLLSGCKGMVATEEQR 99
OsGEX1 MRRHAGTIILLLLILACLWLCPGRSSGFSWNIFFSSSSSSSPPTAGESRAAPMLELDGAVADFLMDGADDPRAVKLLENARSKLAGPSNCWQEAYRRLFASCGDIMADKEMQ 110

```

211

```

AtGEX1 KRFAYLSDCFIKDSGRPAFPTCKDESVMMSCLKKLDDHEHKIYLDFLLETNTICQQLQSNAFKNEIERLVNELKNTAQYTEDKLDILESKSDALIQTSSMIHDSLGSLD 211
BrGEX1 KRFAYLSDCFQKESGRPDFPTCNDKQTMMSCLLKKLDDHEHKIYLEFMLETNTICQQLQSHALKNEIERLVNDLKRSAQNTEEKLDILESKSDDILQGTSKIHESVGLID 209
OsGEX1 SRLAWHLSSCFQEDSGRPPFPRCGEVSDMVHCRKRLGVSEDQVLEFFLETNLCHQLQAEAFKHNTERLVNDLTRTSKSAEKELVIEERSDQIIQESRKVQETISIE 220

```

321

```

AtGEX1 VRVQNVASVTNTLETSSVSGLSQQTVEISQEKNIAESQLALRDGQVKMKETLKDGMDFLDAYTNIQEGVDKLSKDTEQIEVEISVLGNNLSTKMIDLQSTTDDIGTKTR 321
BrGEX1 VVVNNVAHKTNTIGTQMSGLSQQTRDIYQEQKSITESQLALKEGQEMGEAMKVGMEMFNDSVTDVKDGVDRLKNDTKQIGGKINQLGEKMSEKMTALENQTSIIIGTMTN 319
OsGEX1 MQADHLAEASKNVGDQIDDVLAHSKAIFEQSKEIADSQAKLREGQTEMRETIDAGMTHIQESYESLGNGMDKLKEEAVDIQREIKTVGDSMSTKMQDLQSTANDIGSVAG 330

```

431

```

AtGEX1 SSLDKQQKLLDGQTVALDGIQFLTRFQSEALQESRNTLQRLKEFSQEQQEDLAKRQEKLQEVHDHFLFENSKSMLEAQVAFEAKQANMFVALDKLFALHNAMLLESRVIKA 431
BrGEX1 STLDNQQKLLEGQSVAIDSIQSLNQFQSEALQESRSTLQRFAEFSQEQQEDLAKRQEQLQVHDHFLFENSKSMLAQEAFEAKQASMFVALDKLFALHNAMLLESRVIKA 429
OsGEX1 KSLENQMQLLDGQSKAMDGLNNLYSFQAQALEESRETVQLAQFGQRQEELSRQEEIRQAHEHLIHNSHILEAQEEFRAKQANIFAALDKLYILHNAILAESRFIKA 440

```

533

```

AtGEX1 FVIYFLSIFVIYMTSTKQTYIIRPRLYIGLCVTLALEVASLRYVN-DTERQAWMIN---LIRSLFALLASAQLLHAALSYRDYEVLNHQILLRLVDKVNDMQSKK---- 533
BrGEX1 FFIYFLSIFVIYMTSTKQTYIIRPRLYIGLCVTLALEVASLRYVN-DEEHRAWVIN---VLRSFAVLASAQLLHSAFTYRDYEVLNHNILLRLVDKVNSMQSKR---- 531
OsGEX1 FFFYCCIVFLIYMLTSAKQTFSIRGHLYFGLCITLLLEIGLIKLGADDIDKQFWISKVFLVRSVFLALATVQMLHAIFTFRDYELLNHHLLLQTLVEKVRALEETAAAGE 550

```

593

```

AtGEX1 -ELSYDE---DTESEVDWTSWVDTLDTDDDDNLADPDYKIPLLIKDNPVTT-----SSLTRRLYNFRPR----- 593
BrGEX1 -EILWDE---DTDSEVDWNSWIDTDITDDDSLGDPDYRIPEIKDNVGFT-----SSMTKRLYNLRPR----- 591
OsGEX1 KMLPYGGGGAESERSLMDYSWFDELADEVDSNADPSYALPGDEQRQVAVVAPRRRHCASPEEVVGENSITTSAGRRYNLRPRSSYRQT 639

```

|        | % identity |        |
|--------|------------|--------|
|        | BrGEX1     | OsGEX1 |
| AtGEX1 | 73.81      | 43.84  |
| BrGEX1 |            | 42.13  |

**Figure S1.** Sequence alignment of AtGEX1 (At5g55490), BrGEX1 (XP\_009120059) and OsGEX1 (XP\_015611623). Alignment was performed using Clustal Omega (<https://www.ebi.ac.uk/Tools/msa/clustalo/>). Amino acid residues that do not match with AtGEX1 are highlighted in pink. CRD is shown as a box. Percent identities between each sequence are shown below the alignment

**Table S1.** PCR Primers Used for Plasmid Construction.

| <b>Name</b> | <b>sequence (5'-3')</b>                   |
|-------------|-------------------------------------------|
| BrGEX1F1    | GCCGCCCCCTTCACCATGGATCATTTTAAAAGAAG       |
| BrGEX1R1    | GGCGCGCCCAACCCTTTTATCGTGGACGGAGATTGT      |
| OsGEX1F2    | GCCGCCCCCTTCACCATGAGGAGACACGCAG           |
| OsGEX1R2    | GGCGCGCCCAACCCTTTCACGTCTGCCTGTA ACTACTCCG |

**Table S2.** PCR Primers Used for Quantitative Real-Time PCR.

| <b>Gene name</b>          | <b>Direction</b> | <b>Sequence (5'-3')</b>      |
|---------------------------|------------------|------------------------------|
| <i>AtGEX1</i> (At5g55490) | Forward          | GGCTTTACATTGGTTTGTGCG        |
|                           | Reverse          | ACTTCATAGTCCCTGTATGACAAAG    |
| <i>UBQ10</i> (At4g05320)  | Forward          | GGCCTTGTATAATCCCTGATGAATAAG  |
|                           | Reverse          | AAAGAGATAACAGGAACGGAAACATAGT |
| <i>BrGEX1</i>             | Forward          | TCTGTCACTGACGTCAAGGTAGG      |
|                           | Reverse          | TCTCCAACGCAGTCATCTTCTC       |
| <i>OsGEX1</i>             | Forward          | GAGAGCCTTGGCAATGGGAT         |
|                           | Reverse          | ATGGCCTTGCTCTGTCCATC         |
